# Supplementary material for: Membrane-anchored calpains – hidden regulators of growth and development beyond plants?
Source: Front Plant Sci. 2023 Dec 19;14:1289785. doi: 10.3389/fpls.2023.1289785 (PMC10762896; doi:10.3389/fpls.2023.1289785)
Supplement: Supplementary file 2 [file Table_1.xlsx]

## Sheet: MEM calpains
Table S1. A list of accession numbers of the analyzed calpain sequences and categorization of membrane-anchored calpains into the 4 types. Calpain characteristics include amino acid length, number of predicted transmembrane segments, active site residues presence and position, and predicted protein domains.
	Type 1
	Taxonomic groups	species	NCBI	UNIPROT	Alga-Pras	Phytozome	AA length	Number of transmembrane segments	Active site residues position	Active site residue	LGL domain	Cluster seed domains	Identified additional protein domains
1	Protists	Stylonychia lemnae B	CDW79695.1	A0A078ABM1			1888	22	1484; 1642; 1662	C, H, N	none	MEM-Linker-CysPc	MEM-TPH-Linker-CysPc
2		Tetrahymena thermophila I	XP_001014448.3	I7ME41			1847	21	1455, 1617, 1637	C, H, N	none	MEM-Linker-CysPc	MEM-Linker-CysPc
3		Thecamonas trahens D	XP_013762165.1	A0A0L0DIP0			1855	23	1282; 1442; 1462	C, H, N	none	MEM-Linker-CysPc	MEM-RfbX-Linker-CysPc
4		Trichomonas vaginalis G3 A	XP_001308640.1	A2FHB3			1545	23	1046; 1209; 1229	C, H, N	none	MEM-Linker-CysPc	MEM-Linker-CysPc
5		Trichomonas vaginalis G3 B	XP_001311046.1				1319	23	1089, 1109	H, N	none	MEM-Linker-CysPc	MEM-Linker-CysPc
6		Trichomonas vaginalis G3 D	XP_001309576				1493	22	1108; 1268; 1288	C, H, N	none	MEM-Linker-CysPc	MEM-Linker-CysPc
7		Trichomonas vaginalis G3 E	XP_001584120				1406	22	1019; 1179; 1199	C, H, N	none	MEM-Linker-CysPc	MEM-DUF4231-Linker-CysPc
8		Tritrichomonas foetus	OHS99756.1	A0A1J4JR60			1715	24	1326, 1489, 1509	S, K, S	none	MEM-Linker-CysPc	MEM-RhaT-PRK08581-Linker-CysPc
	Type 2
	Taxonomic groups	species	NCBI	UNIPROT	Alga-Pras	Phytozome	AA length	Number of transmembrane segments	Active site residues position	Active site residue	LG3	Cluster seed domains	Identified additional protein domains
9	Protists	Cafeteria roenbergensis	KAA0169926.1	A0A5A8DWV7			1824	24	1416; 1581; 1606	C, H, N	none	MEM-Linker-CysPc-CBSW	MEM-Linker-CysPc-CBSW
10		Klebsormidium flaccidum			kfl00386_0020		2315	23	1915, 2080, 2103	C, H, N	Yes	MEM-Linker-CysPc-CBSW	MEM-ArsB_NhaD_permease-Caldesmon-Linker-CysPc-CBSW
11		Klebsormidium nitens	GAQ87896.1	A0A1Y1IGP1_1			2344	24	1944; 2109; 2132	C, H, N	Yes	MEM-Linker-CysPc-CBSW	MEM-ArsB_NhaD_permease-Caldesmon-Linker-CysPc-CBSW
12		Mesostigma viride	RPFO00000000				2969	22	2572; 2730; 2750	C, H, N	yes	MEM-Linker-CysPc-CBSW	MEM-fibronec_FbpA-Linker-CysPc-CBSW
13		Polarella glacialis A	CAE8645872.1	A0A813I5N7			1864	19	1487; 1644; 1664	C, H, N	none	MEM-Linker-CysPc-CBSW	MEM-SMC_prok_B-Linker-CysPc-CBSW
14		Stentor coeruleus	OMJ91637.1	A0A1R2CRL9			1642	23	1264; 1420; 1440	C, H, N	none	MEM-Linker-CysPc-CBSW	MEM-EcfT-Linker-CysPc-CBSW
15		Stylonychia lemnae A	CDW72149.1	A0A077ZRQ4			1879	12	1471, 1644, 1664	C, H, N	None	MEM-Linker-CysPc-CBSW	MEM-Stt3-SMC_N-Linker-CysPc-CBSW
16		Symbiodinium microadriaticum	OLP88566.1	A0A1Q9D064			932	9	717, 737	H, N	None	MEM-Linker-CysPc-CBSW	MEM-Linker-CysPc-CBSW
17		Symbiodinium minutum A			symbB.v1.2.037338.t1		2254	23	1874, 2037, 2057	C, H, N	none	MEM-Linker-CysPc-CBSW	MEM-DUF3488-Linker-CysPc-CBSW
18		Symbiodinium natans	CAE7526188.1	A0A812TJF7			1797	21	1425; 1582; 1602	C, H, N	none	MEM-Linker-CysPc-CBSW	MEM-CwlO1-Linker-CysPc-CBSW
19		Symbiodinium sp. KB8	CAE7743811.1	A0A812XM39			2418	8	717, 737	H, N	None	MEM-Linker-CysPc-CBSW	MEM-Linker-CysPc-PseudoU_synt-Pumilio-Pumilio-CBSW
20		Thecamonas trahens A	XP_013761671.1	A0A0L0DRW5			1759	22	1395; 1556; 1576	C, H, N	none	MEM-Linker-CysPc-CBSW	MEM-Linker-CysPc-CBSW
21		Thecamonas trahens C	XP_013755667.1	A0A0L0DHF8			1700	22	1336; 1485; 1505	C, H, N	none	MEM-Linker-CysPc-CBSW	MEM-MS_channel-Linker-CysPc-CBSW
22	Algae	Nitella mirabilis	Demko et al., 2014				1598	23	1223; 1381; 1401	C, H, N	yes	MEM-Linker-CysPc-CBSW	MEM-Linker-CysPc-CBSW
23		Vitrella brassicaformis CCMP3155	CEM11427.1	A0A0G4FDZ9			2290	22	1842; 2043; 2068	C, H, N	none	MEM-Linker-CysPc-CBSW	PLN00411-MEM-Linker-CysPc-CBSW
24	Plantae	Amaranthus hypochondriacus				AH007639-RA	2126	20	1719; 1894; 1914	C, H, N	yes	MEM-Linker-CysPc-CBSW	MEM-CCDC66-Linker-CysPc-CBSW
25		Arabidopsis thaliana	NP_001185238.1	F4I0A4			2179	23	1789; 1947; 1967	C, H, N	yes	MEM-Linker-CysPc-CBSW	MEM-Linker-CysPc-CBSW
26		Brachypodium distachyon	XP_003570209.1				2163	24	1773; 1931; 1951	C, H, N	yes	MEM-Linker-CysPc-CBSW	MEM-CCDC66-LamG-Linker-CysPc-CBSW
27		Brassica oleracea	XP_013591406.1				2180	23	1790; 1948; 1968	C, H, N	yes	MEM-Linker-CysPc-CBSW	MEM-TPH-LamG-Linker-CysPc-CBSW
28		Ceratodon purpureus	KAG0586321.1				2168	22	1777; 1935; 1955	C, H, N	yes	MEM-Linker-CysPc-CBSW	MEM-Cgr1-Linker-CysPc-CBSW
29		Glycine max	XP_003532791.1				2151	21	1761; 1919; 1939	C, H, N	yes	MEM-Linker-CysPc-CBSW	MEM-CCDC66-Linker-CysPc-CBSW
30		Hordeum vulgare	XP_044951338.1				2160	24	1770; 1928; 1948	C, H, N	yes	MEM-Linker-CysPc-CBSW	MEM-CitT-7TMR-DISM_7TM-CCDC66-LamG-Linker-CysPc-CBSW
31		Chorispora bungeana	KA022283.1				2152	21	1762; 1920; 1940	C, H, N	yes	MEM-Linker-CysPc-CBSW	MEM-TPH-LamG-Linker-CysPc-CBSW
32		Marchantia polymorpha A	PTQ43239.1				2188	23	1799; 1955; 1975	C, H, N	yes	MEM-Linker-CysPc-CBSW	MEM-Linker-CysPc-CBSW
33		Marchantia polymorpha B	PTQ43217.1				2199	23	1808; 1966; 1986	C, H, N	yes	MEM-Linker-CysPc-CBSW	MEM-7tm_3-Linker-CysPc-CBSW
34		Nicotiana benthamiana	AAQ55288.2				2142	24	1752; 1910; 1930	C, H, N	yes	MEM-Linker-CysPc-CBSW	MEM-TPH-LamG-Linker-CysPc-CBSW
35		Oryza sativa	AAL38190.1				2162	22	1772; 1930; 1950	C, H, N	yes	MEM-Linker-CysPc-CBSW	MEM-LamG-Linker-CysPc-CBSW
36		Papaver somniferum	RZC77761.1				2245	24	1855; 2013; 2033	C, H, N	yes	MEM-Linker-CysPc-CBSW	MEM-CCDC66-Linker-CysPc-CBSW
37		Physcomitrium patens	XP_024400265.1				2172	22	1781; 1939; 1959	C, H, N	yes	MEM-Linker-CysPc-CBSW	MEM-Linker-CysPc-CBSW
38		Populus tomentosa	AXY97643.1				2157	24	1767; 1925; 1945	C, H, N	yes	MEM-Linker-CysPc-CBSW	MEM-CCDC66-LamG-Linker-CysPc-CBSW
39		Selaginella moellendorffii A	EFJ11164.1				2070	23	1680; 1838; 1858	C, H, N	yes	MEM-Linker-CysPc-CBSW	MEM-Linker-CysPc-CBSW
40		Solanum tuberosum	XP_006367593.1				2142	24	1752; 1910; 1930	C, H, N	yes	MEM-Linker-CysPc-CBSW	MEM-TPH-LamG-Linker-CysPc-CBSW
41		Trifolium subterraneum	GAU18738.1				2124	21	1727; 1885; 1905	C, H, N	yes	MEM-Linker-CysPc-CBSW	MEM-CCDC66-LamG-Linker-CysPc-CBSW
42		Vitis vinifera	XP_002285732.1				2159	24	1769; 1927; 1947	C, H, N	yes	MEM-Linker-CysPc-CBSW	MEM-CCDC66-LamG-Linker-CysPc-CBSW
43		Zea mays	NP_001105528.1	Q8RVL1			2159	21	1769; 1927; 1947	C, H, N	yes	MEM-Linker-CysPc-CBSW	MEM-Linker-CysPc-CBSW
	Type 3
	Taxonomic groups	species	NCBI	UNIPROT	Alga-Pras	Phytozome	AA length	Number of transmembrane segments	Active site residues position	Active site residue	LG3	Cluster seed domains	Identified additional protein domains
44	Protists, Oomycota	Aphanomyces euteiches	KAF0736714	A0A6G0X9E6			2523	22	2017, 2191, 2211	G, A, N	none	C2-MEM-Linker-CysPc-WW	C2-MEM-Linker-CysPc-WW
45		Aphanomyces stellatus	KAF0687209	A0A485LHZ7			2555	22	2047, 2221, 2241	G, A, N	none	C2-MEM-Linker-CysPc-WW	C2-MEM-Linker-CysPc-WW
46		Ectocarpus siliculosus A	CBJ48349.1	D7FQ17			3821	20	3311, 3492, 3512	S, A, N	none	MEM-Linker-CysPc	TadD-TPR-PHA03169-C2-MEM-Linker-CysPc
47		Globisporangium splendens	KAF1320507.1				2571	23	2077, 2251, 2271	S, A, N	none	MEM-Linker-CysPc	C2-MEM-ArsB_NhaD_permease-Linker-CysPc
48		Phytophthora infestans C	XP_002906106.1	D0MZ44			2537	24	1985, 2167, 2187	A, A, N	none	C2-MEM-Linker-CysPc-WW	C2-MEM-Linker-CysPc-WW
49		Phytophthora kernoviae	RLN54551	A0A3F2RLZ6			2930	20	2370, 2557, 2577	A, A, N	none	C2-MEM-Linker-CysPc-WW	AdoMet_Mtases-C2-YitT-MEM-Linker-CysPc-WW
	Type 4
	Taxonomic groups	species	NCBI	UNIPROT	Alga-Pras	Phytozome	AA length	Number of transmembrane segments	Active site residues position	Active site residue	LG3	Cluster seed domains	Identified additional protein domains
50	Protists, Oomycota	Achlya hypogyna	OQR84703.1	A0A1V9YG42			2496	24	1988; 2162, 2182	G, A, N	none	C2-MEM-Linker-CysPc-CBSW-WW	C2-MEM-MFS-Linker-CysPc-CBSW-WW
51		Albugo candida	CCI46915.1	A0A024GJ80			2524	24	2013; 2187; 2207	L, A, N	none	C2-MEM-Linker-CysPc-CBSW-WW	C2-MEM-ABC2_membrane-Linker-CysPc-CBSW-WW
52		Albugo laibachii E	CCA19505.1	F0WE76			2547	22	2036; 2210; 2230	L, S, N	none	C2-MEM-Linker-CysPc-CBSW-WW	C2-MEM-RhaT-Linker-CysPc-CBSW-WW
53		Aphanomyces astaci	RHY04163.1	A0A397A8M0			2574	20	2066; 2240; 2260	G, A, N	none	C2-MEM-Linker-CysPc-CBSW-WW	C2-MEM-Linker-CysPc-CBSW-WW
54		Aphanomyces invadans	RHY26440.1	A0A418ANE1			2619	22	2111; 2285; 2305	G, A, N	none	C2-MEM-Linker-CysPc-CBSW-WW	C2-MEM-MFS-Linker-CysPc-CBSW-WW
55		Hondaea fermentalgiana	GBG28739.1	A0A2R5GEK5			2910	20	2309; 2483; 2503	G, A, N	none	C2-MEM-Linker-CysPc-CBSW-WW	C2 (x4)-MEM-Linker-CysPc-CBSW-WW
56		Nothophytophthora sp Chile5	RLN73930.1	A0A662XC86			2664	24	2110; 2293; 2313	A, A, N	none	C2-MEM-Linker-CysPc-CBSW-WW	C2-MEM-Linker-CysPc-CBSW-WW
57		Phytophthora aleatoria	KAG6960442	A0A8J5IL36			2633	22	2075; 2262; 2282	A, A, N	none	C2-MEM-Linker-CysPc-CBSW-WW	C2-MEM-Linker-CysPc-CBSW-WW
58		Phytophthora cactorum B	RAW43498.1	A0A329T4K4			2614	24	2056; 2243; 2263	A, A, N	none	C2-MEM-Linker-CysPc-CBSW-WW	C2-MEM-Linker-CysPc-CBSW-WW
59		Phytophthora capsici			jgi|PhycaF7|10039		2416	16	1867; 2049; 2069	A, A, N	none	C2-MEM-Linker-CysPc-CBSW-WW	C2-MEM-Linker-CysPc-CBSW-WW
60		Phytophthora cinnamomi	KAG6623455				2626	20	2065; 2252; 2272	A, A, N	none	C2-MEM-Linker-CysPc-CBSW-WW	C2-MEM-Linker-CysPc-CBSW-WW
61		Phytophthora fragariae	KAE9203299	A0A6G0NDA9			2642	24	2084; 2271, 2291	A, A, N	none	C2-MEM-Linker-CysPc-CBSW-WW	C2-MEM-Linker-CysPc-CBSW-WW
62		Phytophthora idaei	KAG3110631				2617	24	2059; 2246; 2266	A, A, N	none	C2-MEM-Linker-CysPc-CBSW-WW	C2-MEM-Linker-CysPc-CBSW-WW
63		Phytophthora megakarya	OWZ16940.1	A0A225WJA5			2401	22	1848; 2035; 2055	A, A, N	none	C2-MEM-Linker-CysPc-CBSW-WW	C2-MEM-Linker-CysPc-CBSW-WW
64		Phytophthora nicotianae	KUF83417	A0A0W8CH91			1750	8	1202, 1380, 1400	A, A, N	None	C2-MEM-Linker-CysPc-CBSW-WW	C2-MEM-Linker-CysPc-CBSW-WW
65		Phytophthora pseudosyringae	KAG7391819				2663	24	2099; 2287, 2307	A, A, N	none	C2-MEM-Linker-CysPc-CBSW-WW	C2-MEM-Linker-CysPc-CBSW-WW
66		Phytophthora ramorum			jgi|Phyra1_1|77875		2653	24	2093; 2280, 2300	A, A, N	none	C2-MEM-Linker-CysPc-CBSW-WW	C2-MEM-Linker-CysPc-CBSW-WW
67		Phytophthora rubi	KAE9031781	A0A6A3N3U2			2642	24	2083; 2270; 2290	A, A, N	none	C2-MEM-Linker-CysPc-CBSW-WW	C2-MEM-Linker-CysPc-CBSW-WW
68		Phytophthora sojae A	EGZ27715.1	G4YH14			2555	22	1994; 2181; 2201	A, A, N	none	C2-MEM-Linker-CysPc-CBSW-WW	CBSW-MEM-DUF2157-Linker-CysPc-WW
69		Phytophthora sojae B			jgi|Physo1_1|137226		2631	22	2070; 2257; 2277	A, A, N	none	C2-MEM-Linker-CysPc-CBSW-WW	CBSW-MEM-DUF2157-Linker-CysPc-WW
70		Plasmopara halstedii 1	XP_024584671.1	A0A0P1B2D9_1			2617	25	2064; 2251; 2271	A, A, N	none	C2-MEM-Linker-CysPc-CBSW-WW	C2-MEM-Linker-CysPc-CBSW-WW
71		Pythium insidiosum	GAX95206	A0A2D4BLI3			2609	22	2079; 2254; 2274	S, A, N	none	C2-MEM-Linker-CysPc-CBSW-WW	C2-MEM-Linker-CysPc-CBSW-WW
72		Pythium oligandrum	TMW60814	A0A8K1CD21			2531	22	2007; 2181; 2201	T, A, N	none	C2-MEM-Linker-CysPc-CBSW-WW	C2-MEM-AI-2E_transport-Linker-CysPc-CalpainIII-WW
73		Saprolegnia diclina VS20	XP_008612797.1	T0Q6U9			2517	20	2009; 2183; 2203	G, A, N	none	C2-MEM-Linker-CysPc-CBSW-WW	C2-MEM-Linker-CysPc-CBSW-WW
74		Saprolegnia parasitica CBS 223 65	XP_012200036.1	A0A067CQU0			2462	20	1962; 2136, 2156	G, A, N	none	C2-MEM-Linker-CysPc-CBSW-WW	C2-MEM-Linker-CysPc-CBSW-WW
The sequences of membrane-anchored calpains were retrieved from the NCBI, UniProt, ALGA-PRAS, or Phytozome protein database (Altschul et al., 1990; Kurotani et al., 2017; The UniProt Consortium, 2023). The Simple Modular Protein Architectures Tool (SMART) determined the number of transmembrane segments (Letunic et al., 2021). The Expassy Prosite protein functional sites database predicted catalyt…
Altschul, S. F., Gish, W., Miller, W., Myers, E. W., & Lipman, D. J. (1990). Basic local alignment search tool. Journal of Molecular Biology, 215(3), 403–410. https://doi.org/10.1016/S0022-2836(05)80360-2
Consortium, T. U. (2023). UniProt: the Universal Protein Knowledgebase in 2023 - Google Scholar. 51(November 2022), 523–531. https://scholar.google.com/scholar?hl=en&as_sdt=0%2C5&q=UniProt%3A+the+Universal+Protein+Knowledgebase+in+2023&btnG=
de Castro, E., Sigrist, C. J. A., Gattiker, A., Bulliard, V., Langendijk-Genevaux, P. S., Gasteiger, E., Bairoch, A., & Hulo, N. (2006). ScanProsite: Detection of PROSITE signature matches and ProRule-associated functional and structural residues in proteins. Nucleic Acids Research, 34(WEB. SERV. ISS.), 362–365. https://doi.org/10.1093/nar/gkl124
Demko, V., Perroud, P. F., Johansen, W., Delwiche, C. F., Cooper, E. D., Remme, P., … Olsen, O. A. (2014). Genetic analysis of DEFECTIVE KERNEL1 loop function in three-dimensional body patterning in Physcomitrella patens. Plant Physiology, 166(2), 903–919. https://doi.org/10.1104/pp.114.243758
Kelley, L. A., Mezulis, S., Yates, C. M., Wass, M. N., & Sternberg, M. J. (2016). Trabajo práctico No 13 . Varianzas en función de variable independiente categórica. Nature Protocols, 10(6), 845–858. https://doi.org/10.1038/nprot.2015-053
Kurotani, A., Yamada, Y., & Sakurai, T. (2017). Alga-PrAS (Algal Protein Annotation Suite): A database of comprehensive annotation in algal proteomes. Plant and Cell Physiology, 58(1), e6. https://doi.org/10.1093/pcp/pcw212
Letunic, I., Khedkar, S., & Bork, P. (2021). SMART: Recent updates, new developments and status in 2020. Nucleic Acids Research, 49(D1), D458–D460. https://doi.org/10.1093/nar/gkaa937
Lu, S., Wang, J., Chitsaz, F., Derbyshire, M. K., Geer, R. C., Gonzales, N. R., Gwadz, M., Hurwitz, D. I., Marchler, G. H., Song, J. S., Thanki, N., Yamashita, R. A., Yang, M., Zhang, D., Zheng, C., Lanczycki, C. J., & Marchler-Bauer, A. (2020). CDD/SPARCLE: The conserved domain database in 2020. Nucleic Acids Research, 48(D1), D265–D268. https://doi.org/10.1093/nar/gkz991
Marchler-Bauer, A., Lu, S., Anderson, J. B., Chitsaz, F., Derbyshire, M. K., DeWeese-Scott, C., Fong, J. H., Geer, L. Y., Geer, R. C., Gonzales, N. R., Gwadz, M., Hurwitz, D. I., Jackson, J. D., Ke, Z., Lanczycki, C. J., Lu, F., Marchler, G. H., Mullokandov, M., Omelchenko, M. V., … Bryant, S. H. (2011). CDD: A Conserved Domain Database for the functional annotation of proteins. Nucleic Acids Res…
Sigrist, C. J. A., De Castro, E., Cerutti, L., Cuche, B. A., Hulo, N., Bridge, A., Bougueleret, L., & Xenarios, I. (2013). New and continuing developments at PROSITE. Nucleic Acids Research, 41(D1), 344–347. https://doi.org/10.1093/nar/gks1067

## Sheet: updated calpain list
Species name	NCBI	ALGA PRAS	Phytozome
Achlya hypogyna	OQR84703.1
Albugo candida	CCI46915.1
Albugo laibachii C	CCA15201.1
Albugo laibachii D	CCA15556.1
Albugo laibachii E	CCA19505.1
Amaranthus hypochondriacus			AH007639-RA
Amphimedon queenslandica A	XP_003388253.1
Amphimedon queenslandica B	XP_003383174.1
Amphimedon queenslandica C	XP_003388061
Aphanomyces astaci	RHY04163.1
Aphanomyces euteiches	KAF0736714
Aphanomyces invadans	RHY26440.1
Aphanomyces stellatus	KAF0687209
Arabidopsis thaliana	NP_001185238.1
Aspergillus flavus A	XP_041141133.1
Aureococcus anophagefferens A	XP_009033027.1
Bigelowiella natans		jgi|Bigna1|87575
Brachypodium distachyon	XP_003570209.1
Brassica oleracea	XP_013591406.1
Caenorhabditis elegans A	NP_001256150.1
Caenorhabditis elegans B	NP_498740.2
Caenorhabditis elegans C	NP_493327.2
Caenorhabditis elegans D	NP_497130
Caenorhabditis elegans E	NP_497964.1
Caenorhabditis elegans F	NP_493052
Caenorhabditis elegans G	NP_497460.2
Caenorhabditis elegans H	NP_502751.1
Caenorhabditis elegans I	NP_500081
Caenorhabditis elegans J	NP_500082.2
Cafeteria roenbergensis	KAA0169926.1
Ceratodon purpureus	KAG0586321.1
Cryptosporidium parvum	XP_627039.1
Drosophila melanogaster A	NP_001097378.1
Drosophila melanogaster B	NP_001246706.1
Drosophila melanogaster C	NP_573118.2
Ectocarpus siliculosus A	CBJ48349.1
Ectocarpus siliculosus F	CBN76529.1
Entamoeba histolytica	XP_657312.1
Fragilariopsis cylindrus	OEU18639.1
Fusarium vanettenii A	XP_003049026.1
Fusarium vanettenii B	XP_003049831.1
Fusarium vanettenii E	XP_003045502.1
Globisporangium splendens	KAF1320507.1
Glycine max	XP_003532791.1
Guillardia theta A	XP_005840650.1
Guillardia theta B	XP_005829438.1
Guillardia theta D	XP_005831306.1
Guillardia theta E	XP_005822266.1
Guillardia theta G	XP_005828695.1
Homo sapiens A	NP_001185797.1
Homo sapiens B	NP_075571.2
Homo sapiens C	NP_008989.2
Homo sapiens D	NP_653292.2
Homo sapiens E	NP_653176.2
Homo sapiens F	NP_001138594.1
Homo sapiens G	NP_005623.1
Homo sapiens I	NP_000061.1
Homo sapiens J	NP_004046.2
Homo sapiens K	NP_055104.2
Homo sapiens L	NP_055111.1
Homo sapiens M	NP_001137434.1
Homo sapiens N	NP_006606.1
Hondaea fermentalgiana	GBG28739.1
Hordeum vulgare	XP_044951338.1
Chlamydomonas reinhardtii A	XP_001699913.1
Chlamydomonas reinhardtii D	XP_001699685.1
Chlamydomonas reinhardtii E	XP_001697275.1
Chorispora bungeana	KA022283.1
Klebsormidium flaccidum		kfl00386_0020
Klebsormidium nitens	GAQ87896.1
Leishmania major A	XP_888574.1
Leishmania major B	XP_001685028.1
Leishmania major C	XP_001685962.1
Leishmania major F	XP_001682944.1
Leishmania major G	XP_001685029.1
Leishmania major H	XP_001686650.1
Leishmania major I	XP_001683905.1
Leishmania major J	XP_001685031.1
Leishmania major K	XP_001682871.1
Marchantia polymorpha A	PTQ43239.1
Marchantia polymorpha B	PTQ43217.1
Mesostigma viride	RPFO00000000
Micromonas pusilla A	XP_003058858.1
Micromonas pusilla D	XP_003058451.1
Monosiga brevicollis A	XP_001749473.1
Monosiga brevicollis B	XP_001745690.1
Monosiga brevicollis C	XP_001746938.1
Mus musculus A	NP_001103974.1
Mus musculus B	NP_035926.2
Mus musculus C	NP_001013789.1
Mus musculus D	Q9ER56.1
Mus musculus E	NP_001028616.1
Mus musculus F	Q9JLG8.1
Mus musculus G	NP_033924.2
Mus musculus H	NP_001171270.1
Mus musculus I	NP_001288179.1
Mus musculus J	CAA73161.1
Mus musculus K	NP_033926.1
Mus musculus L	NP_001139278.1
Mus musculus M	NP_076198.2
Naegleria gruberi A	XP_002681002.1
Naegleria gruberi B	XP_002676539.1
Naegleria gruberi C	XP_002675459.1
Naegleria gruberi D	XP_002677185.1
Naegleria gruberi E	XP_002669862.1
Naegleria gruberi G	XP_002683209.1
Naegleria gruberi H	XP_002671835.1
Naegleria gruberi I	XP_002681712.1
Naegleria gruberi J	XP_002675446.1
Naegleria gruberi K	XP_002680345.1
Nematostella vectensis A	XP_001632256.1
Nematostella vectensis C	EDO48633.1
Nematostella vectensis D	XP_032230471.1
Nematostella vectensis E	EDO45797.1
Nematostella vectensis F	EDO37991.1
Nicotiana benthamiana	AAQ55288.2
Nitella	Demko et al., 2014
Nothophytophthora sp Chile5	RLN73930.1
Oryza sativa	AAL38190.1
Ostreococcus tauri A	XP_003080866.1
Ostreococcus tauri B	XP_003082682
Oxytricha trifallax	EJY71039.1
Papaver somniferum	RZC77761.1
Paramecium tetraurelia A	XP_001435766.1
Paramecium tetraurelia B	XP_001425556.1
Paramecium tetraurelia D	XP_001451328.1
Paramecium tetraurelia E	XP_001426629.1
Paramecium tetraurelia F	XP_001425483.1
Paramecium tetraurelia G	XP_001461329.1
Paramecium tetraurelia H	XP_001436817.1
Paramecium tetraurelia I	XP_001436276.1
Paramecium tetraurelia K	XP_001436818.1
Paramecium tetraurelia L	XP_001456567.1
Paramecium tetraurelia M	XP_001428146.1
Paramecium tetraurelia N	XP_001453823.1
Paramecium tetraurelia O	XP_001428132.1
Phaeodactylum tricornutum	XP_002179240.1
Physcomitrium patens	XP_024400265.1
Phytophthora aleatoria	KAG6960442
Phytophthora cactorum A	KAF1778202.1
Phytophthora cactorum B	RAW43498.1
Phytophthora capsici		jgi|PhycaF7|10039
Phytophthora cinnamomi	KAG6623455
Phytophthora fragariae	KAE9203299
Phytophthora idaei	KAG3110631
Phytophthora infestans A	XP_002897717.1
Phytophthora infestans B	XP_002898060.1
Phytophthora infestans C	XP_002906106.1
Phytophthora infestans D	XP_002902875.1
Phytophthora infestans E	XP_002907368.1
Phytophthora kernoviae	RLN54551
Phytophthora megakarya	OWZ16940.1
Phytophthora nicotianae	KUF83417
Phytophthora pseudosyringae	KAG7391819
Phytophthora ramorum		jgi|Phyra1_1|77875
Phytophthora rubi	KAE9031781
Phytophthora sojae A	EGZ27715.1
Phytophthora sojae B		jgi|Physo1_1|137226
Plasmopara halstedii 1	XP_024584671.1
Plasmopara halstedii 2	XP_024572120.1
Podospora anserina S mat+ A	XP_001907932.1
Podospora anserina S mat+ B	XP_001910927.1
Podospora anserina S mat+ C	XP_001909443.1
Podospora anserina S mat+ D	XP_001907546.1
Podospora anserina S mat+ E	XP_001906506.1
Polarella glacialis A	CAE8645872.1
Populus tomentosa	AXY97643.1
Pseudocohnilembus persalinus	KRX05605.1
Pythium brassicum	TYZ60474
Pythium insidiosum	GAX95206
Pythium oligandrum	TMW60814
Salinispora tropica	ABP52968.1
Salpingoeca rosetta A	XP_004992608.1
Salpingoeca rosetta D	XP_004995676.1
Saprolegnia diclina VS20	XP_008612797.1
Saprolegnia parasitica CBS 223 65	XP_012200036.1
Sclerotinia sclerotiorum A	XP_001591551.1
Sclerotinia sclerotiorum C	XP_001598773.1
Sclerotinia sclerotiorum D	XP_001590107.1
Selaginella moellendorffii A	EFJ11164.1
Solanum tuberosum	XP_006367593.1
Spizellomyces punctatus	XP_016610878.1
Stentor coeruleus	OMJ91637.1
Stylonychia lemnae A	CDW72149.1
Stylonychia lemnae B	CDW79695.1
Symbiodinium microadriaticum	OLP88566.1
Symbiodinium minutum A		symbB.v1.2.037338.t1
Symbiodinium minutum B		symbB.v1.2.010056.t1
Symbiodinium natans	CAE7526188.1
Symbiodinium sp. KB8	CAE7743811.1
Tetrahymena thermophila B	XP_001031428.2
Tetrahymena thermophila C	XP_001026036.2
Tetrahymena thermophila D	XP_001021774.2
Tetrahymena thermophila E	XP_001019306.2
Tetrahymena thermophila G	XP_001017319.1
Tetrahymena thermophila H	XP_001013616.2
Tetrahymena thermophila I	XP_001014448.3
Tetrahymena thermophila K	XP_001033008.1
Tetrahymena thermophila SB210 B	XP_001032573.2
Thalassiosira pseudonana	XP_002288957.1
Thecamonas trahens A	XP_013761671.1
Thecamonas trahens B	XP_013760057.1
Thecamonas trahens C	XP_013755667.1
Thecamonas trahens D	XP_013762165.1
Thecamonas trahens E	XP_013761630.1
Thecamonas trahens F	XP_013754436.1
Thecamonas trahens G	XP_013758212.1
Thecamonas trahens H	XP_013753350.1
Thecamonas trahens I	XP_013761396.1
Trifolium subterraneum	GAU18738.1
Trichomonas vaginalis G3 A	XP_001308640.1
Trichomonas vaginalis G3 B	XP_001311046.1
Trichomonas vaginalis G3 D	XP_001309576
Trichomonas vaginalis G3 E	XP_001584120
Trichoplax adhaerens A	XP_002107604.1
Trichoplax adhaerens B	XP_002108316.1
Trichoplax adhaerens C	XP_002111255.1
Trichoplax adhaerens D	XP_002109313.1
Tritrichomonas foetus	OHS99756.1
Trypanosoma brucei A	XP_822445.1
Trypanosoma brucei B	XP_001218912.1
Trypanosoma brucei C	XP_001218911.1
Trypanosoma brucei D	XP_001218910.1
Trypanosoma brucei F	XP_844545.1
Trypanosoma brucei H	XP_847656.1
Trypanosoma brucei K	XP_828540.1
Trypanosoma brucei N	AAG48627.1
Vitis vinifera	XP_002285732.1
Vitrella brassicaformis CCMP3155	CEM11427.1
Volvox carteri f. nagariensis A	XP_002951622.1
Volvox carteri f. nagariensis B	XP_002957060.1
Zea mays	NP_001105528.1
